# Supplementary material for: Design of a multi-signature ensemble classifier predicting neuroblastoma patients' outcome
Source: PubMed Central journal article supplement (PMC3314564; doi:10.1186/1471-2105-13-s4-s13), 2012-03-28

# ST1,ST2,ST3,ST4s

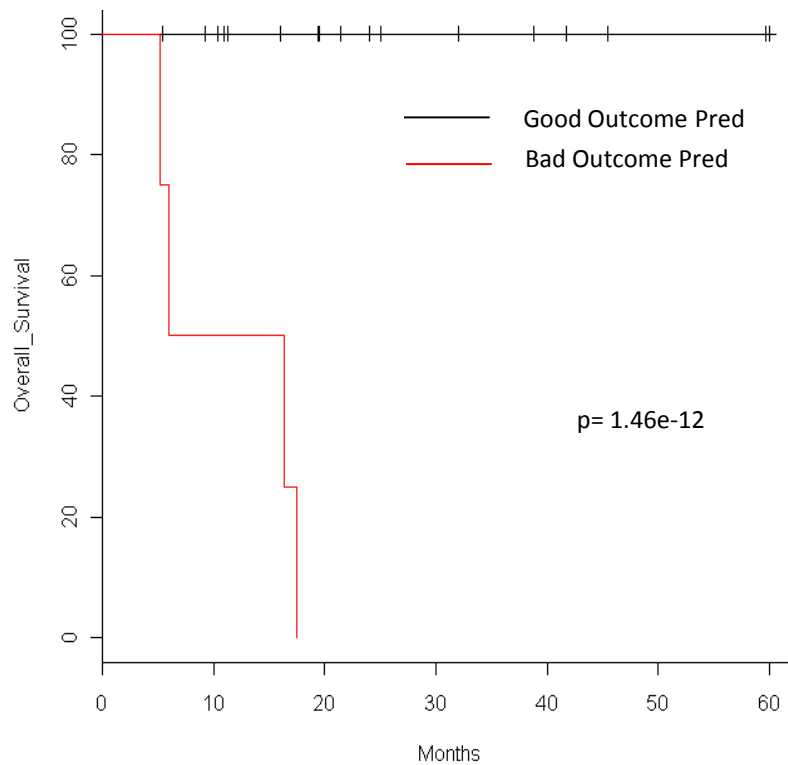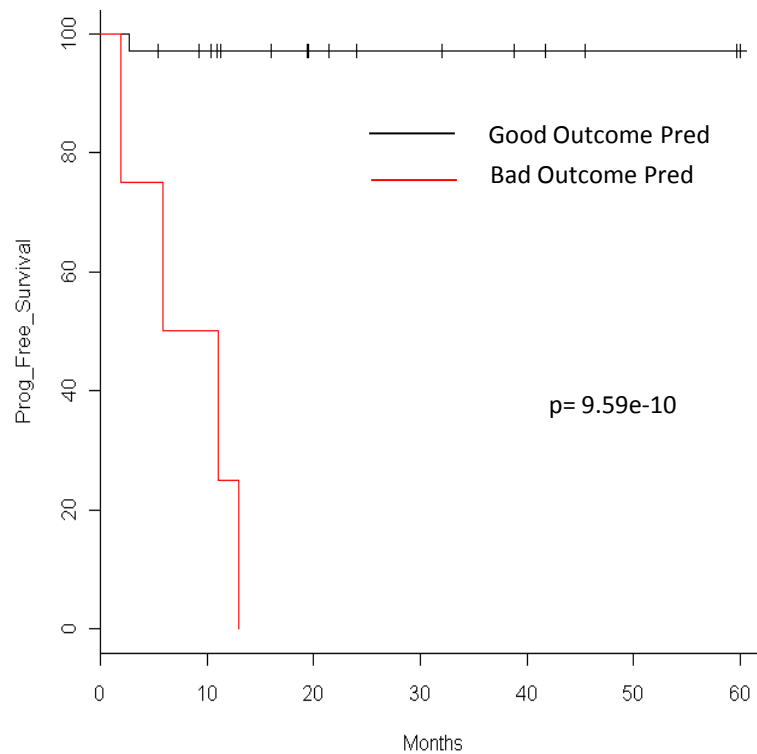

Supplement: 1471-2105-13-S4-S13-S4.pdf [file 1471-2105-13-S4-S13-S4.pdf]
