# Supplementary material for: Design of a multi-signature ensemble classifier predicting neuroblastoma patients' outcome
Source: PubMed Central journal article supplement (PMC3314564; doi:10.1186/1471-2105-13-s4-s13), 2012-03-28

# MYCN Not Amplified

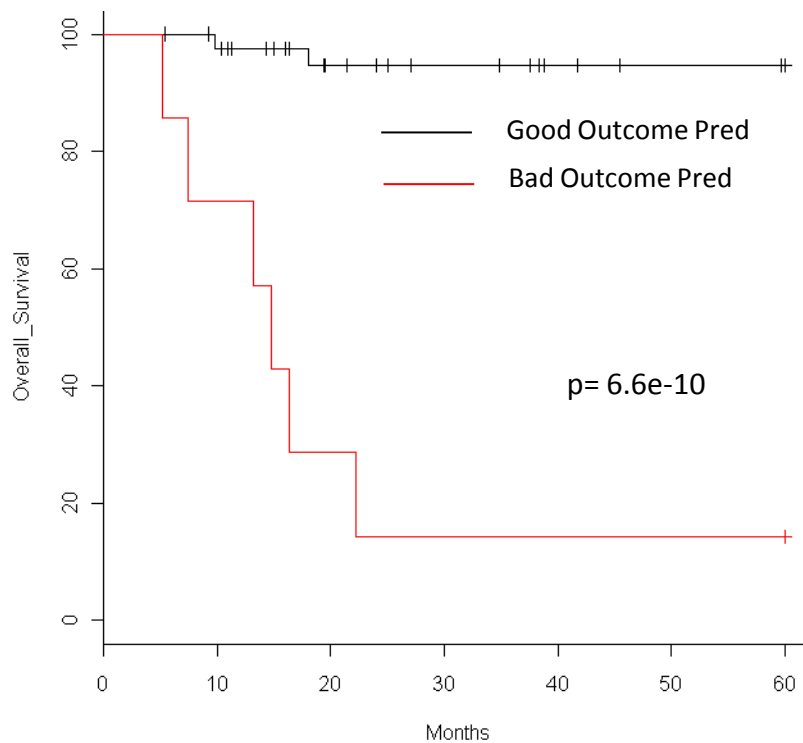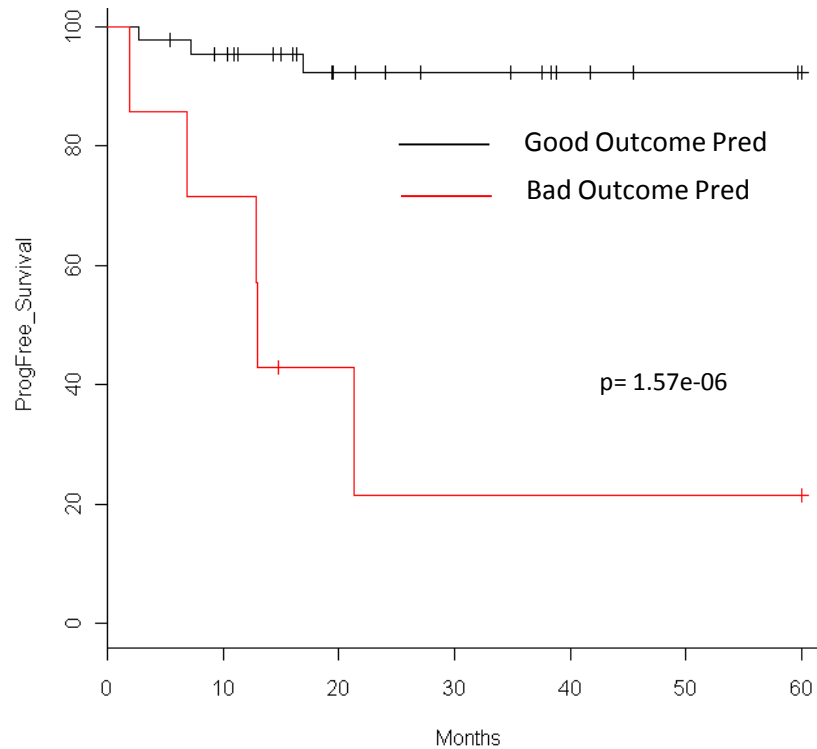

Supplement: 1471-2105-13-S4-S13-S6.pdf [file 1471-2105-13-S4-S13-S6.pdf]
